# Supplementary material for: Air Quality Assessment in the Central Mediterranean Sea (Tyrrhenian Sea): Anthropic Impact and Miscellaneous Natural Sources, including Volcanic Contribution, on the Budget of Volatile Organic Compounds (VOCs)
Source: MDPI journal article supplement (doi:10.3390/atmos12121609), 2021-12-02
Supplement: s1 [file s1]

Supplementary

# Air quality assessment in the central Mediterranean Sea (Tyrrhenian Sea): anthropic impact and miscellaneous natural sources, including volcanic contribution, on the budget of volatile organic compounds (VOCs)

Francesca Vichi<sup>1,\*</sup>, Antonietta Ianniello<sup>1</sup>, Massimiliano Frattoni<sup>1</sup>, Andrea Imperiali<sup>1</sup>, Giulio Esposito<sup>1</sup>, Maria Concetta Tomasi Scianò<sup>1</sup>, Mattia Perilli<sup>1</sup> and Angelo Cecinato<sup>1</sup>

<sup>1</sup> Institute of Atmospheric Pollution Research, National Research Council of Italy, Strada Provinciale 35d, 9, Montelibretti, 00010 Rome, Italy

\* francesca.vichi@iia.cnr.it; Tel.: +39-06-90672802

**Citation:** Vichi, F.; Ianniello, A.; Frattoni, M.; Imperiali, A.; Esposito, G.; Tomasi Scianò, M.C.; Perilli, M.; Cecinato, A. Air quality assessment in the central Mediterranean Sea (Tyrrhenian Sea): anthropic impact and miscellaneous natural sources, including volcanic contribution, on the budget of volatile organic compounds (VOCs). *Atmosphere* **2021**, volume number, x. <https://doi.org/10.3390/xxxxx>

Academic Editor(s):

Received: date

Accepted: date

Published: date

**Publisher's Note:** MDPI stays neutral with regard to jurisdictional claims in published maps and institutional affiliations.

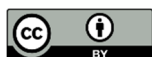

**Copyright:** © 2021 by the authors. Submitted for possible open access publication under the terms and conditions of the Creative Commons Attribution (CC BY) license (<http://creativecommons.org/licenses/by/4.0/>).

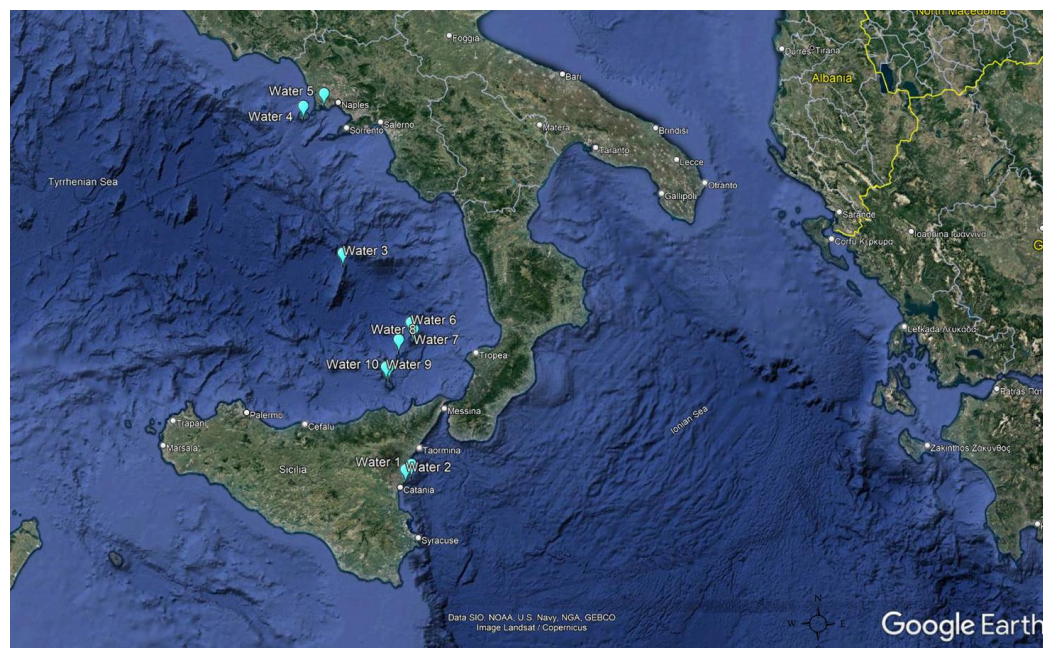

**Figure S1.** Water sampling points during 2017 cruise.

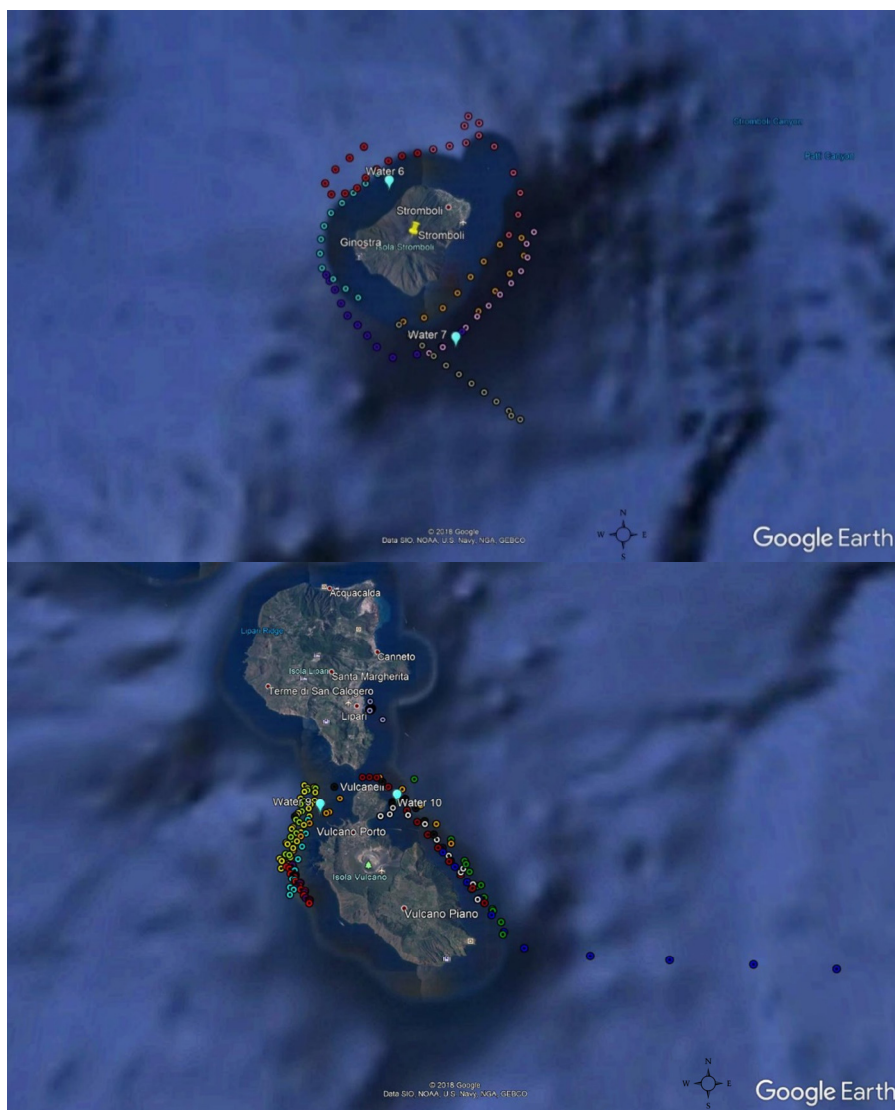

Blue 29 Aug 20.58-22.58  
 Orange 29 Aug 20.58-22.58  
 Lilac 30 Aug 09.08-11.08  
 Grey 30 Aug 18.37-20.37  
 Light blue 30 Aug 20.55-22.55  
 Red 31 Aug 09.00-11.00  
 Pink 31 Aug 11.00-13.00  
  
 Green 02 Sept 00.00-02.00  
 Yellow 02 Sept 02.00-06.30  
 Light blue 02 Sept 06.30-08.30  
 Purple 02 Sept 09.00-11.00  
 Red 02 Sept 11.04-13.04  
 Orange 02 Sept 13.06-15.06  
 Dark green 02 Sept 15.08-17.08  
 Lilac 02 Sept 17.10-19.00  
 White 04 Sept 10.58-12.58  
 Black 04 Sept 16.57-18.57  
 Dark red 04 Sept 20.59-22.59  
 Blue 05 Sept 11.01-13.01

**Figure S2.** Details of sampling points in the Aeolian area during the 2017 cruise.

**Table S1.** OVOCs sampling periods.

| OVOC Sample | Sampling area              | Start Date              | Stop Date                  |
|-------------|----------------------------|-------------------------|----------------------------|
| 1           | Route to Acitrezza         | 8/20/17 9:00            | 8/20/17 17:00              |
| 2           | Acireale (water 1)         | 8/20/17 23:00           | 8/21/17 7:00               |
| 3           | Aci Trezza-Acireale        | 8/21/17 9:00            | 8/21/17 17:00              |
| 4           | Acicastello (water 2)      | 8/21/17 23:00           | 8/22/17 7:00               |
| 5           | Acicastello (water 2)      | 8/22/17 9:00            | 8/22/17 17:00              |
| 6           | Route to Marsili           | 8/22/17 23:00           | 8/23/17 7:00               |
| 7           | South of Marsili           | 8/23/17 9:00            | 8/23/17 17:00              |
| 8           | North of Marsili           | 8/23/17 17:00           | 8/23/17 23:00              |
| 9           | North of Marsili (water 3) | 8/23/17 23:00           | 8/24/17 8:20               |
| 10          | Marsili                    | 8/24/17 9:00            | 8/24/17 17:00              |
| 11          | Route to Ischia            | 8/24/17 23:00           | 8/25/17 7:00               |
| 12          | Ischia (water 4)           | 8/25/17 9:00            | 8/25/17 17:00              |
| 13          | Phlegraean Fields          | Pozzuoli Gulf (water 5) | 8/25/17 23:00 8/26/17 7:00 |
| 14          | Phlegraean Fields          | Pozzuoli Gulf (water 5) | 8/26/17 9:00 8/26/17 17:00 |
| 15          | Phlegraean Fields          | Pozzuoli Gulf (water 5) | 8/26/17 23:00 8/27/17 7:00 |

|    |                                                         |               |               |
|----|---------------------------------------------------------|---------------|---------------|
| 16 | Phlegraeen Fields Pozzuoli Gulf (water 5)               | 8/27/17 9:00  | 8/27/17 17:00 |
| 17 | Backward Route from Phlegraeen Fields                   | 8/27/17 23:00 | 8/28/17 7:00  |
| 18 | Route southwards to Stromboli                           | 8/28/17 9:00  | 8/28/17 17:00 |
| 19 | Stromboli (water 6)                                     | 8/29/17 9:00  | 8/29/17 17:00 |
| 20 | Stromboli                                               | 8/29/17 23:00 | 8/30/17 7:00  |
| 21 | Stromboli (water 7)                                     | 8/30/17 9:00  | 8/30/17 17:00 |
| 22 | Stromboli 1                                             | 8/30/17 23:00 | 8/31/17 7:00  |
| 23 | Stromboli-Route to Panarea                              | 8/31/17 9:00  | 8/31/17 17:00 |
| 24 | Panarea (between Dattilo and Lisca Bianca)              | 8/31/17 23:00 | 9/1/17 7:00   |
| 25 | Panarea (between Dattilo and Lisca Bianca)<br>(water 8) | 9/1/17 9:00   | 9/1/17 17:00  |
| 26 | Vulcano (water 9)                                       | 9/2/17 9:00   | 9/2/17 17:00  |
| 27 | Lipari                                                  | 9/2/17 17:00  | 9/2/17 23:00  |
| 28 | Lipari                                                  | 9/2/17 23:00  | 9/3/17 7:00   |
| 29 | Lipari                                                  | 9/3/17 9:00   | 9/3/17 17:00  |
| 30 | Lipari                                                  | 9/3/17 23:00  | 9/4/17 7:00   |
| 31 | Vulcano                                                 | 9/4/17 9:00   | 9/4/17 17:00  |
| 32 | Vulcano (water10)                                       | 9/4/17 23:00  | 9/5/17 7:00   |
| 33 | Vulcano - Route to Messina                              | 9/5/17 9:00   | 9/5/17 23:00  |

**Table S2.** VOCs sampling periods.

| VOC<br>Sample | Sampling area                      | Start Date    | Stop Date     |
|---------------|------------------------------------|---------------|---------------|
| 1             | Acitrezza                          | 8/20/17 20:48 | 8/20/17 22:48 |
| 2             | Acitrezza                          | 8/21/17 10:59 | 8/22/17 12:59 |
| 3             | Acicastello                        | 8/21/17 20:59 | 8/21/17 22:59 |
| 4             | Acicastello                        | 8/22/17 10:59 | 8/22/17 12:59 |
| 5             | Heading to Messina Strait          | 8/22/17 20:55 | 8/22/17 22:55 |
| 6             | Marsili                            | 8/23/17 9:00  | 8/23/17 11:00 |
| 7             | Marsili                            | 8/23/17 11:02 | 8/23/17 13:02 |
| 8             | Marsili                            | 8/23/17 13:05 | 8/23/17 15:05 |
| 9             | Marsili                            | 8/23/17 15:07 | 8/23/17 17:07 |
| 10            | Marsili                            | 8/23/17 17:09 | 8/23/17 19:09 |
| 11            | Marsili                            | 8/23/17 19:09 | 8/23/17 21:09 |
| 12            | Marsili                            | 8/23/17 22:40 | 8/23/17 0:40  |
| 13            | Route to Ischia                    | 8/24/17 11:00 | 8/24/17 13:00 |
| 14            | Ischia                             | 8/24/17 21:00 | 8/24/17 23:00 |
| 15            | Ischia                             | 8/25/17 11:28 | 8/25/17 13:28 |
| 16            | Route to Phlegraeen Fields         | 8/25/17 21:00 | 8/25/17 23:00 |
| 17            | Phlegraeen Fields                  | 8/26/17 10:56 | 8/26/17 12:56 |
| 18            | Phlegraeen Fields                  | 8/26/17 21:01 | 8/26/17 23:01 |
| 19            | Phlegraeen Fields                  | 8/27/17 11:00 | 8/27/17 13:00 |
| 20            | Phlegraeen Fields - Gulf of Naples | 8/27/17 21:03 | 8/27/17 23:03 |
| 21            | Route to Stromboli                 | 8/28/17 11:40 | 8/28/17 13:40 |
| 22            | Stromboli                          | 8/28/17 20:57 | 8/28/17 22:57 |
| 23            | Stromboli                          | 8/29/17 10:59 | 8/29/17 12:59 |
| 24            | Stromboli                          | 8/29/17 16:58 | 8/29/17 18:55 |
| 25            | Stromboli                          | 8/29/17 20:58 | 8/29/17 22:58 |
| 26            | Stromboli                          | 8/29/17 22:58 | 8/29/17 0:58  |
| 27            | Stromboli                          | 8/30/17 9:08  | 8/30/17 11:08 |
| 28            | Stromboli                          | 8/30/17 18:37 | 8/30/17 20:37 |

|    |                            |               |               |
|----|----------------------------|---------------|---------------|
| 29 | Stromboli                  | 8/30/17 20:55 | 8/30/17 22:55 |
| 30 | Stromboli                  | 8/31/17 9:00  | 8/31/17 11:00 |
| 31 | Stromboli                  | 8/31/17 11:00 | 8/31/17 13:00 |
| 32 | Panarea                    | 8/31/17 20:56 | 8/31/17 22:56 |
| 33 | Panarea                    | 9/1/17 11:46  | 9/1/17 13:46  |
| 34 | Panarea - Route to Vulcano | 9/1/17 21:17  | 9/1/17 23:17  |
| 35 | Vulcano                    | 9/2/17 0:00   | 9/2/17 2:00   |
| 36 | Vulcano                    | 9/2/17 2:00   | 9/2/17 6:30   |
| 37 | Vulcano                    | 9/2/17 6:30   | 9/2/17 8:30   |
| 38 | Vulcano                    | 9/2/17 9:00   | 9/2/17 11:00  |
| 39 | Vulcano                    | 9/2/17 11:04  | 9/2/17 13:04  |
| 40 | Vulcano                    | 9/2/17 13:06  | 9/2/17 15:06  |
| 41 | Vulcano                    | 9/2/17 15:08  | 9/2/17 17:08  |
| 42 | Lipari                     | 9/2/17 17:10  | 9/2/17 19:00  |
| 43 | Lipari                     | 9/3/17 11:01  | 9/3/17 13:01  |
| 44 | Lipari                     | 9/3/17 20:58  | 9/3/17 22:58  |
| 45 | Vulcano                    | 9/4/17 10:58  | 9/4/17 12:58  |
| 46 | Vulcano                    | 9/4/17 16:57  | 9/4/17 18:57  |
| 47 | Vulcano                    | 9/4/17 20:59  | 9/4/17 22:59  |
| 48 | Vulcano                    | 9/5/17 11:01  | 9/5/17 13:01  |

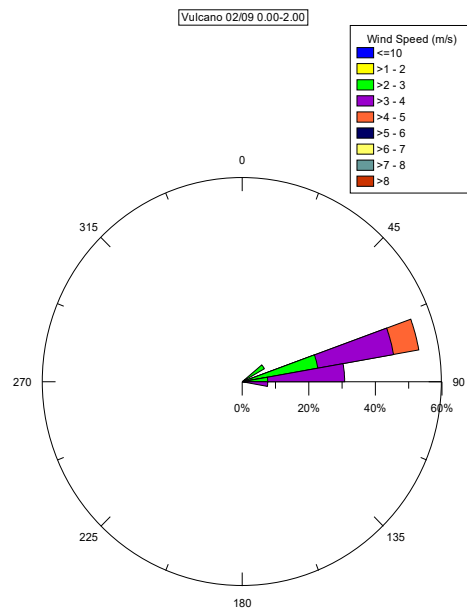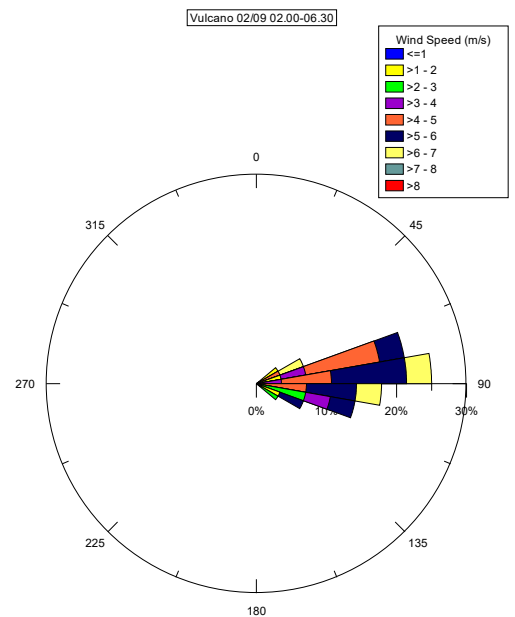

Vulcano 02/09 06.30-08.30

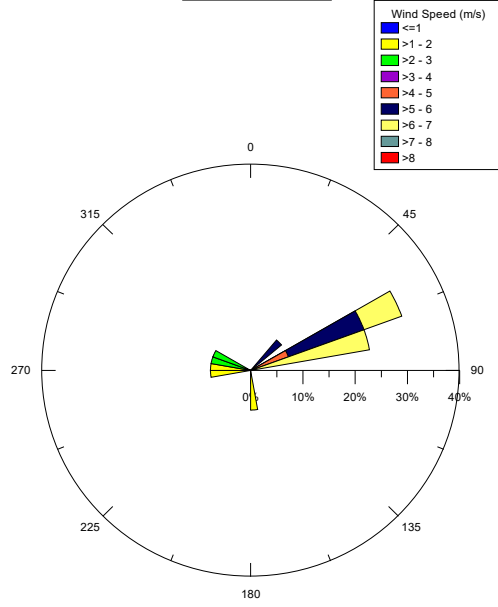

Vulcano 02/09 09.00-11.00

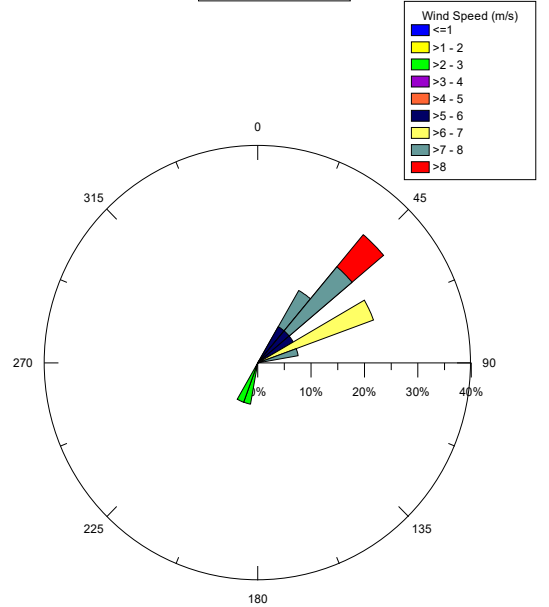

Vulcano 02/09 11.00-13.00

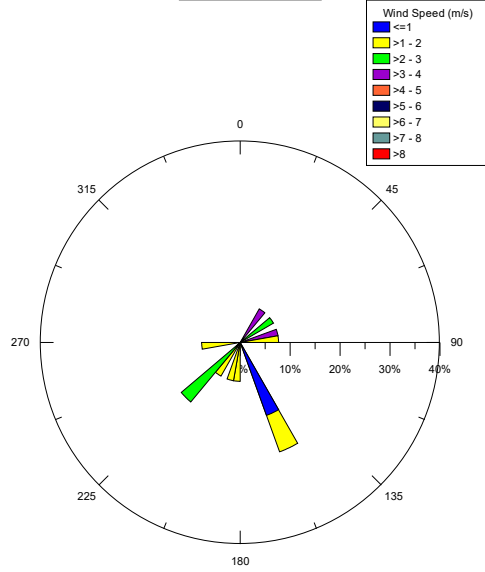

Vulcano 02/09 13.00-15.00

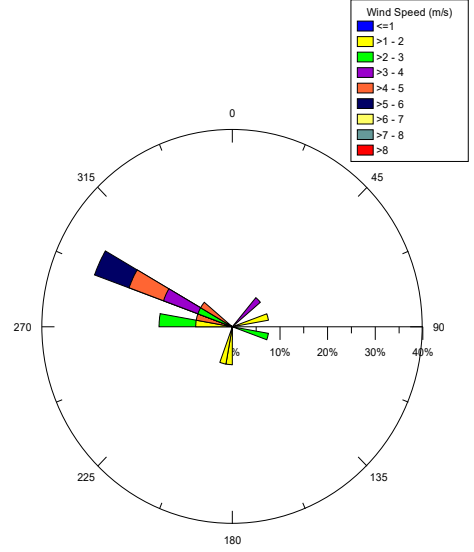

Vulcano 02/09 15.00-17.00

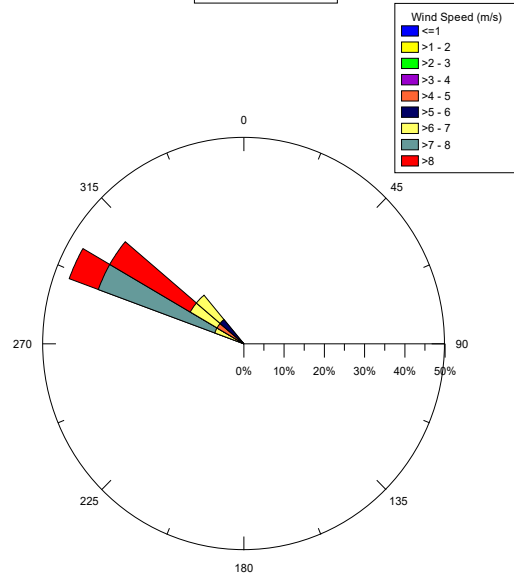

Vulcano 04/09 11.00-13.00

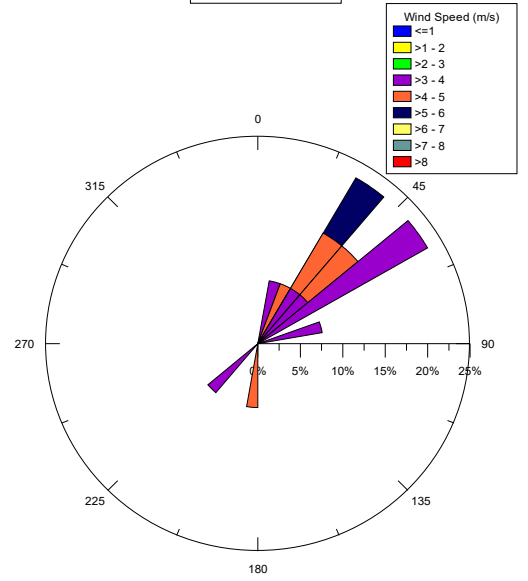

Vulcano 04/09 11.00-13.00

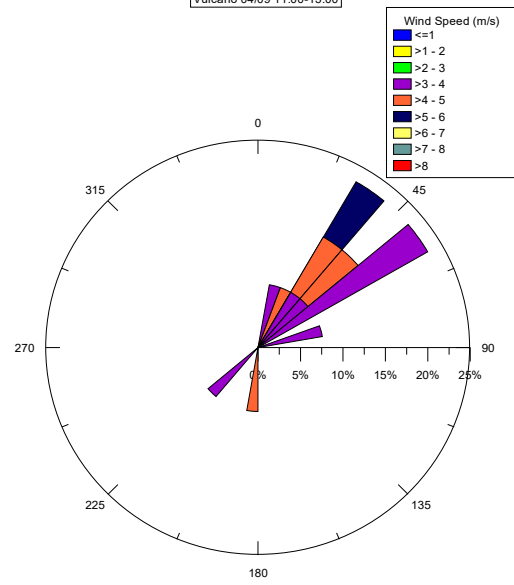

Vulcano 04/09 17.00-19.00

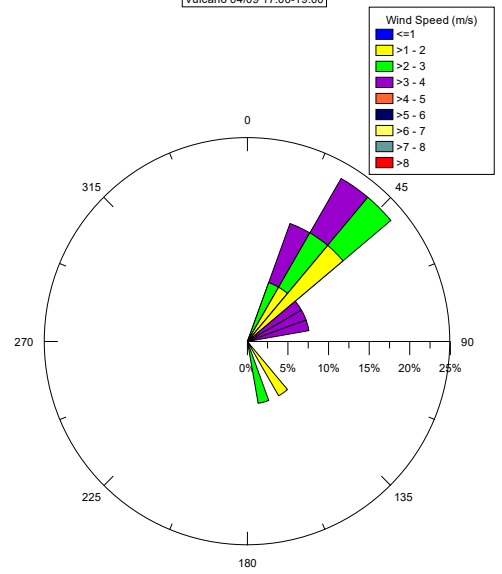



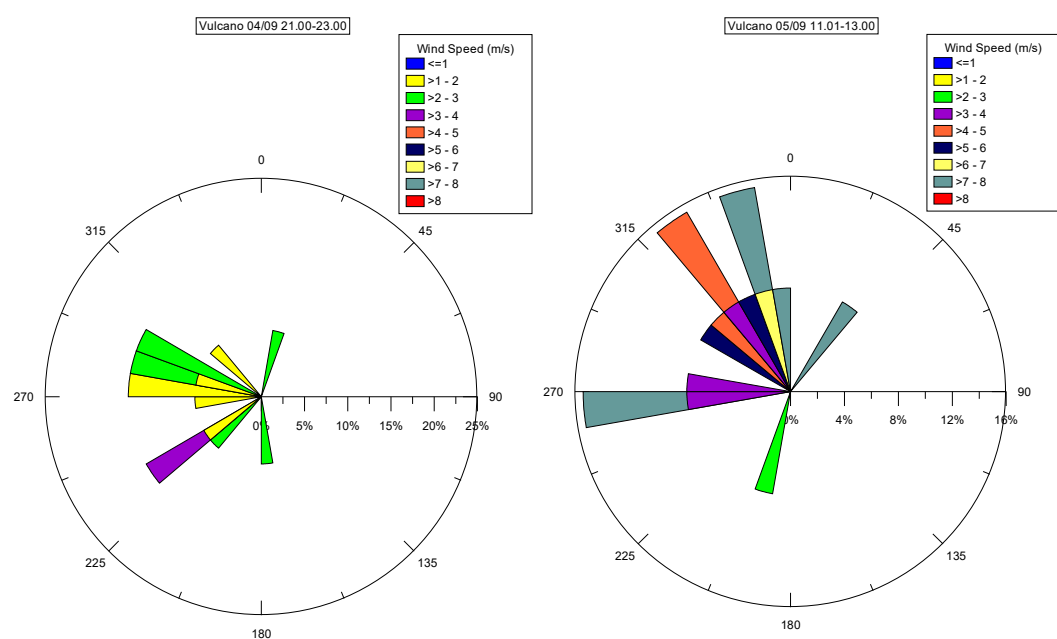

**Figure S3.** Windroses relative to Vulcano samplings.

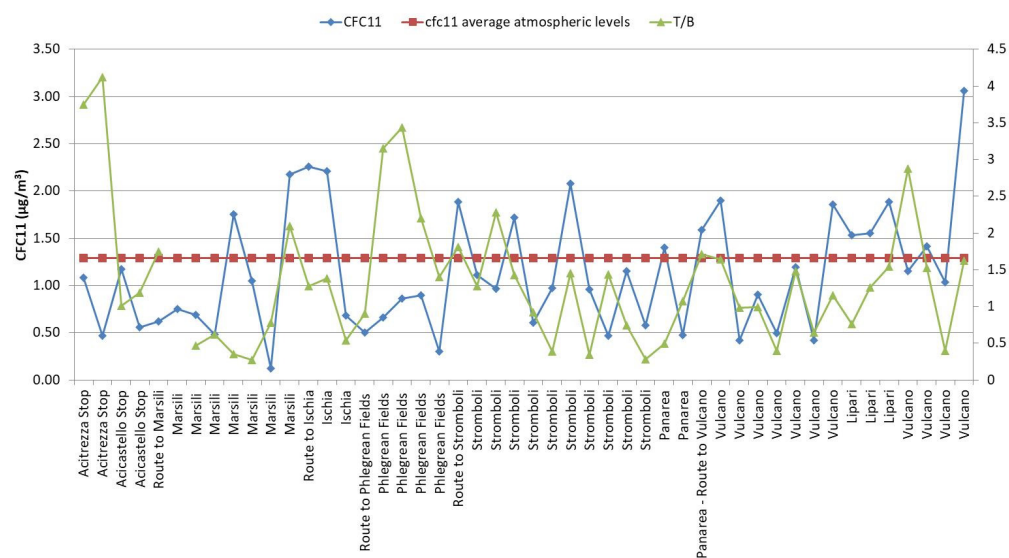

**Figure S4.** Plot of CFC11 concentrations against the average atmospheric levels and the toluene to benzene ratio.

**Table S3.** Date and location of water samplings.

| Sample  | Site        | Date       | Lat      | Lon      |
|---------|-------------|------------|----------|----------|
| water 1 | Acireale    | 08/20/2017 | 37.58397 | 15.23754 |
| water 2 | Acicastello | 08/20/2017 | 37.53935 | 15.17406 |
| water 3 | Marsili     | 08/23/2017 | 39.40166 | 14.42142 |

|          |                  |            |          |          |
|----------|------------------|------------|----------|----------|
| water 4  | Ischia           | 08/25/2017 | 40.68779 | 13.90354 |
| water 5  | PhlegraeanFields | 08/27/2017 | 40.80389 | 14.13871 |
| water 6  | Stromboli 1      | 08/29/2017 | 38.80958 | 15.20523 |
| water 7  | Stromboli 2      | 08/30/2017 | 38.75193 | 15.2343  |
| water 8  | Panarea          | 09/01/2017 | 38.64092 | 15.07369 |
| water 9  | Vulcano          | 09/02/2017 | 38.42119 | 14.93886 |
| water 10 | Vulcano          | 09/05/2017 | 38.42438 | 14.97336 |

---
